# Supplementary material for: Tracking the Replication-Competent Zika Virus with Tetracysteine-Tagged Capsid Protein in Living Cells
Source: PubMed Central journal article supplement (PMC9006885; doi:10.1128/jvi.01846-21), 2022-03-14
Supplement: jvi.01846-21-s0001.pdf [file jvi.01846-21-s0001.pdf]

## SUPPLEMENTAL INFORMATIONS

### **Movie S1 Real-time imaging of the TC27 capsid protein in living cells.**

Vero cells were infected with the NR-TC27 ZIKV. The TC27 capsid proteins, pulse-chase labeled with ReAsH (red), were continuously tracked for 201 min. Nuclei were stained with Hoechst 33258 (blue).

**Movie S2 Real-time imaging of the distribution of the TC27 capsid proteins expressed at different time.** The previously expressed TC27 capsid proteins were labeled with FIAsH (green), and the newly expressed TC27 capsid proteins were pulse-chase labeled with ReAsH (red) in the infected cells.

**Movie S3 Real-time imaging of single ReAsH-labeled NR-TC27 ZIKV particle moving along cellular filopodia.** hCMEC/D3<sup>Lifect-EGFP</sup> cells were infected with the ReAsH-labeled NR-TC27 ZIKV (red), and the process of single NR-TC27 ZIKV particle moving along cellular filopodia was imaged in real time.

**Movie S4 Real-time imaging of single double-labeled NR-TC27 ZIKV particle entering a hCMEC/D3 cell.** The single NR-TC27 ZIKV particle was labeled with FIAsH and DiD. Red: DiD labeled envelope; Green: FIAsH labeled capsid.

**Movie S5 Real-time imaging of the infection process of single double-labeled NR-TC27 ZIKV.** The single NR-TC27 ZIKV particle was labeled with FIAsH and DiD. Red: DiD labeled envelope; Green: FIAsH labeled capsid.
